# Supplementary material for: Cerebrospinal fluid flow cytometry distinguishes psychosis spectrum disorders from differential diagnoses
Source: PubMed Central journal article supplement (PMC8873003; doi:10.1038/s41380-021-01244-5), 2021-08-06
Supplement: 41380_2021_1244_MOESM2_ESM.pdf [file 41380_2021_1244_MOESM2_ESM.pdf]

Supplementary table 1

| Group  | Subgroup | Pseudonym | Sex | Age | Clinical signs (at sample taking)                                                                                                                 | Pos. psychotic<br>sympt. (a.s.t.) | Disease             |                | GAF | APDs | Comorb. (a.s.t.)                                                    | NMDAR<br>ab | ICU<br>(a.s.t.) |
|--------|----------|-----------|-----|-----|---------------------------------------------------------------------------------------------------------------------------------------------------|-----------------------------------|---------------------|----------------|-----|------|---------------------------------------------------------------------|-------------|-----------------|
|        |          |           |     |     |                                                                                                                                                   |                                   | duration<br>(years) | Prev.<br>hosp. |     |      |                                                                     |             |                 |
| F2x    | F20.0    | 261630    | m   | 35  | hallucinations, delusions                                                                                                                         | yes                               | 0                   | 0              | 32  | 1    | arterial<br>hypertension                                            | no          | no              |
| F2x    | F20.0    | 329163    | m   | 23  | paranoid delusions, hallucinations                                                                                                                | yes                               | 0                   | 1              | 28  | 1    | conjunctivitis                                                      | no          | no              |
| F2x    | F20.0    | 337421    | m   | 22  | visual hallucinations, paranoid delusions, social withdrawal                                                                                      | yes                               | 4                   | 4              | 45  | 1    | none                                                                | no          | no              |
| F2x    | F20.0    | 493172    | m   | 45  | chronic acoustic hallucinations, poor attention                                                                                                   | yes                               | 8                   | 4              | 40  | 1    | hyperthyroidism                                                     | no          | no              |
| F2x    | F20.0    | 481349    | m   | 31  | persistent acoustic hallucinations, delusions, sleep disturbance                                                                                  | yes                               | 5                   | 2              | 30  | 1    | oesophagitis                                                        | no          | no              |
| F2x    | F20.0    | 229838    | f   | 27  | paranoid delusions, delusions of grandeur                                                                                                         | yes                               | 4                   | 2              | 10  | 1    | conjunctivitis                                                      | no          | no              |
| F2x    | F20.0    | 560933    | f   | 28  | paranoid delusions, cognitive deficits                                                                                                            | yes                               | 0                   | 0              | 30  | 1    | alcohol abuse,<br>cannabis abuse,<br>amphetamine<br>abuse           | no          | no              |
| F2x    | F20.0    | 134672    | m   | 24  | desorganized behavior, delusions, obsessive-<br>compulsive behaviour                                                                              | yes                               | 4                   | 4              | 21  | 1    | arthritis                                                           | no          | no              |
| F2x    | F20.0    | 657447    | m   | 23  | chronic acoustic hallucinations, mood<br>disturbances, impulse control deficits                                                                   | yes                               | 2                   | 0              | 21  | 1    | none                                                                | no          | no              |
| F2x    | F20.0    | 257239    | f   | 20  | acute psychotic exacerbation with paranoid<br>delusions, anxiety, aggressive behavior                                                             | yes                               | 0                   | 0              | 15  | 1    | none                                                                | no          | no              |
| F2x    | F20.0    | 628721    | m   | 31  | paranoid delusions, anxiety, disorganized<br>behavior                                                                                             | yes                               | 0                   | 0              | 35  | 1    | none                                                                | no          | no              |
| F2x    | F20.0    | 162186    | f   | 55  | paranoid delusions, social withdrawal, blunted<br>affect                                                                                          | yes                               | 3                   | 0              | 24  | 1    | arterial<br>hypertension                                            | no          | no              |
| F2x    | F20.0    | 394476    | m   | 26  | acoustic hallucinations, delusions, mood<br>changes, anxiety                                                                                      | yes                               | 3                   | 2              | 40  | 1    | none                                                                | no          | no              |
| F2x    | F20.0    | 645563    | m   | 22  | delusions, depressive symptoms                                                                                                                    | yes                               | 0                   | 1              | 25  | 1    | none                                                                | no          | no              |
| F2x    | F20.0    | 727870    | m   | 24  | conversion disorder with motor symptoms                                                                                                           | no                                | 3                   | 5              | 45  | 1    | conversion<br>disorder with<br>motor symptom                        | no          | no              |
| F2x    | F20.0    | 824899    | m   | 28  | paranoid delusions, social withdrawal, blunted<br>affect                                                                                          | yes                               | 0                   | 0              | 21  | 1    | cannabis abuse,<br>Crohn's Disease                                  | no          | no              |
| F2x    | F20.0    | 831603    | m   | 49  | suicidal ideation, chronic acoustic<br>hallucinations                                                                                             | yes                               | 30                  | >10            | 31  | 1    | none                                                                | no          | no              |
| F2x    | F20.0    | 970549    | f   | 22  | depersonalization, derealization, attention<br>deficit                                                                                            | no                                | 1                   | 1              | 25  | 0    | cannabis abuse,<br>borderline<br>personality<br>disorder            | no          | no              |
| F2x    | F20.0    | 567584    | m   | 25  | delusions, formal thought disorder, attention<br>deficit, obsessions                                                                              | yes                               | 7                   | 3              | 38  | 1    | OCD, arterial<br>hypertension                                       | no          | no              |
| F2x    | F20.0    | 320776    | f   | 46  | altered perceptions                                                                                                                               | no                                | 8                   | 1              | 42  | 1    | conversion<br>disorder, migraine                                    | no          | no              |
| F2x    | F20.0    | 224222    | m   | 32  | suicidal ideation, acoustic and visual<br>hallucinations, delusions                                                                               | yes                               | na                  | 0              | 18  | 1    | cannabis abuse                                                      | no          | no              |
| F2x    | F20.0    | 349460    | m   | 36  | paranoid delusions, acoustic hallucinations                                                                                                       | yes                               | 11                  | 5              | 28  | 1    | none                                                                | no          | no              |
| F2x    | F20.0    | 914975    | m   | 18  | paranoid delusions, illusions                                                                                                                     | yes                               | 0                   | 0              | 20  | 0    | none                                                                | no          | no              |
| F2x    | F20.0    | 255817    | m   | 26  | depressive symptoms and chronic acoustic<br>hallucinations                                                                                        | yes                               | 1                   | 1              | 41  | 0    | cannabis abuse                                                      | no          | no              |
| F2x    | F20.1    | 998918    | m   | 22  | desorganized behavior, formal thought disorder                                                                                                    | no                                | 3                   | 5              | 25  | 1    | none                                                                | no          | no              |
| F2x    | F20.1    | 631319    | m   | 19  | blunted affect, formal thought disorder,<br>attention deficit                                                                                     | no                                | 10                  | 5              | 21  | 1    | none                                                                | no          | no              |
| F2x    | F20.2    | 564805    | f   | 62  | pernicious catatonia, ECT treatment,<br>fluctuating consciousness                                                                                 | no                                | 4                   | 2              | 8   | 1    | psoriasis                                                           | no          | yes             |
| F2x    | F20.3    | 785071    | m   | 45  | paranoid delusions, desorganized behavior,<br>tension                                                                                             | yes                               | 4                   | 3              | 20  | 1    | alcohol abuse,<br>arterial<br>hypertension,<br>obesity              | no          | no              |
| F2x    | F20.4    | 259990    | f   | 54  | depressive symptoms, social withdrawal                                                                                                            | no                                | 0                   | 0              | 41  | 1    | none                                                                | no          | no              |
| F2x    | F22.0    | 417762    | f   | 47  | delusion, tactile hallucinations                                                                                                                  | yes                               | 2                   | 2              | 48  | 1    | nodular goiter                                                      | no          | no              |
| F2x    | F22.0    | 581234    | m   | 37  | delusions, anxiety, depression                                                                                                                    | yes                               | 0                   | 0              | 35  | 1    | psoriasis                                                           | no          | no              |
| F2x    | F22.0    | 570989    | m   | 62  | paranoid delusions, delusions of reference                                                                                                        | yes                               | 1                   | 1              | 48  | 1    | none                                                                | no          | no              |
| F2x    | F22.0    | 423680    | f   | 58  | delusions, delusions of control                                                                                                                   | yes                               | 4                   | 0              | na  | 1    | migraine                                                            | no          | no              |
| F2x    | F22.0    | 283220    | m   | 60  | paranoid delusions, delusions of control,<br>acoustic hallucinations                                                                              | yes                               | 1                   | 0              | 46  | 1    | none                                                                | no          | no              |
| F2x    | F22.0    | 170216    | m   | 47  | paranoid delusions                                                                                                                                | yes                               | 1                   | 0              | 40  | 1    | none                                                                | no          | no              |
| F2x    | F23.0    | 570688    | m   | 58  | paranoid delusions, agitation, anxiety                                                                                                            | yes                               | 0                   | 0              | 28  | 1    | stroke, myocardial<br>infarction                                    | no          | no              |
| F2x    | F23.0    | 567263    | m   | 25  | paranoid delusions, formal thought disorder,<br>suspiciousness                                                                                    | yes                               | 0                   | 0              | 28  | 1    | none                                                                | no          | no              |
| F2x    | F23.0    | 605522    | f   | 31  | delusions of control, formal thought disorder,<br>agitation, anxiety                                                                              | yes                               | 0                   | 0              | 30  | 0    | none                                                                | no          | no              |
| F2x    | F23.1    | 478219    | f   | 47  | paranoid delusions, derealization                                                                                                                 | yes                               | 0                   | 0              | 21  | 1    | none                                                                | no          | no              |
| F2x    | F23.1    | 789818    | f   | 27  | anxiety, paranoid delusions                                                                                                                       | yes                               | 0                   | 0              | 15  | 1    | none                                                                | no          | no              |
| F2x    | F23.1    | 446456    | f   | 24  | paranoid delusions, coenesthetic hallucinations                                                                                                   | yes                               | 0                   | 0              | 35  | 1    | none                                                                | no          | no              |
| F2x    | F25.0    | 878131    | m   | 20  | manic-psychotic presentation with paranoid<br>delusions and delusions of grandeur, agitation<br>and impulsivity                                   | yes                               | 2                   | 1              | 14  | 1    | none                                                                | no          | no              |
| F2x    | F25.1    | 705596    | f   | 53  | suicidality, severe depression                                                                                                                    | no                                | 30                  | 10             | 10  | 1    | seizure                                                             | no          | no              |
| F2x    | F25.1    | 479845    | f   | 61  | depressed mood, reduced energy                                                                                                                    | no                                | 14                  | 3              | 38  | 1    | arterial<br>hypertension                                            | no          | no              |
| F2x    | F25.1    | 236253    | f   | 62  | dysphoric mood, agitation, disorientation                                                                                                         | no                                | 12                  | 5              | 26  | 1    | type 2 diabetes,<br>primary biliary<br>cirrhosis                    | no          | no              |
| F2x    | F25.1    | 460296    | f   | 64  | desorganized behavior, delusions, depressed<br>mood                                                                                               | yes                               | 1                   | 2              | 30  | 1    | cerebral<br>microangiopathy                                         | no          | no              |
| F2x    | F25.1    | 144757    | m   | 24  | delusions of control, paranoid delusions,<br>suicidal ideation                                                                                    | yes                               | 2                   | 1              | 35  | 1    | arterial<br>hypertension                                            | no          | no              |
| F2x    | F25.1    | 614608    | f   | 44  | somatic delusions, blunted affect, anhedonia                                                                                                      | yes                               | 5                   | 5              | 42  | 1    | seizures                                                            | no          | no              |
| F2x    | F25.1    | 264491    | m   | 45  | delusions, high levels of anxiety, suicide<br>attempt                                                                                             | yes                               | 7                   | 1              | 15  | 1    | none                                                                | no          | no              |
| F2x    | F25.1    | 544317    | f   | 22  | depressed mood, reduced energy, rumination,<br>anxiety                                                                                            | yes                               | 1                   | 0              | na  | 1    | PCO,<br>neurodermatitis                                             | no          | no              |
| F2x    | F25.2    | 512581    | m   | 66  | depressed mood, paranoid delusions, formal<br>thought disorder                                                                                    | yes                               | 55                  | 2              | 35  | 1    | atrial fibrillation                                                 | no          | no              |
| F2x    | F23.2    | 122988    | f   | 31  | paranoid delusions, acoustic hallucinations                                                                                                       | yes                               | 0                   | 0              | 25  | 1    | none                                                                | no          | no              |
| F2x    | F25.2    | 611704    | m   | 23  | delusions of control, somatic delusions                                                                                                           | yes                               | 0                   | 0              | 42  | 1    | hypothyroidism                                                      | no          | no              |
| F2x    | F20.0    | 660254    | m   | 25  | suicidality, thought insertion, reduced energy                                                                                                    | yes                               | 0.5                 | 2              | 22  | 1    | none                                                                | no          | no              |
| F2x    | F20.0    | 763828    | m   | 22  | concentration deficits, thought insertion                                                                                                         | yes                               | 0.5                 | 1              | 45  | 1    | none                                                                | no          | no              |
| F2x    | F20.0    | 655091    | m   | 29  | delusions of reference, paranoid delusions,<br>concentration deficits                                                                             | yes                               | 0.5                 | 2              | 17  | 1    | none                                                                | no          | no              |
| F2x    | F20.0    | 953835    | m   | 40  | depressed mood, reduced energy,<br>concentration deficits                                                                                         | no                                | 17                  | 2              | 40  | 1    | amphetamine<br>abuse, ADHD                                          | no          | no              |
| F2x    | F23.1    | 377589    | m   | 22  | delusions of grandeur, thought withdrawal,<br>formal thought disorder                                                                             | yes                               | 0                   | 0              | 12  | 1    | none                                                                | no          | no              |
| F2x    | F20.0    | 646918    | f   | 34  | paranoid delusions, visual hallucinations,<br>delusions of control                                                                                | yes                               | 0                   | 0              | 15  | 1    | none                                                                | no          | no              |
| NMDARE | -        | 975938    | f   | 37  | acute psychosis                                                                                                                                   | yes                               | -                   | -              | -   | -    | teratoma                                                            | yes         | no              |
| NMDARE | -        | 679603    | f   | 22  | seizures                                                                                                                                          | no                                | -                   | -              | -   | -    | none                                                                | yes         | no              |
| NMDARE | -        | 571459    | f   | 18  | cognitive impairment, personality changes,<br>hallucinations, avolition                                                                           | yes                               | -                   | -              | -   | -    | none                                                                | yes         | no              |
| NMDARE | -        | 969801    | m   | 78  | seizures, altered mental status, dysphagia                                                                                                        | no                                | -                   | -              | -   | -    | s/p EBV<br>encephalitis, OSA,<br>diabetes, arterial<br>hypertension | yes         | no              |
| NMDARE | -        | 787718    | f   | 22  | cognitive impairment, speech disturbance,<br>anxiety, hallucinations                                                                              | yes                               | -                   | -              | -   | -    | neurodermatitis,<br>migraine, tension<br>headache                   | yes         | no              |
| NMDARE | -        | 660736    | m   | 42  | psychomotor retardation, personality changes,<br>speech disturbance, fever, myoclonia, altered<br>mental status, dysphagia, seizures              | no                                | -                   | -              | -   | -    | none                                                                | yes         | no              |
| NMDARE | -        | 208806    | f   | 51  | disorientation, agitation, psychomotor<br>retardation                                                                                             | no                                | -                   | -              | -   | -    | atrial fibrillation,<br>SCC, diabetes                               | yes         | no              |
| NMDARE | -        | 340667    | m   | 25  | personality changes, acute psychosis,<br>aggressive behaviour, mutism, stupor, seizures                                                           | yes                               | -                   | -              | -   | -    | none                                                                | yes         | no              |
| NMDARE | -        | 435039    | f   | 68  | hallucinations                                                                                                                                    | yes                               | -                   | -              | -   | -    | arterial<br>hypertension,<br>hypothyroidism                         | yes         | no              |
| NMDARE | -        | 417259    | f   | 28  | acute psychosis, seizures                                                                                                                         | yes                               | -                   | -              | -   | -    | none                                                                | yes         | no              |
| NMDARE | -        | 477294    | f   | 21  | personality changes, speech disturbance,<br>disorientation, psychomotor retardation,<br>emotional instability, cognitive impairment,<br>avolition | yes                               | -                   | -              | -   | -    | hypothyroidism,<br>migraine, tension<br>headache                    | yes         | no              |
| NMDARE | -        | 992432    | f   | 18  | insomnia, acute psychosis, seizures, mutism,<br>hypersexuality                                                                                    | yes                               | -                   | -              | -   | -    | teratoma                                                            | yes         | na              |
| NMDARE | -        | 391845    | f   | 26  | fever, seizures                                                                                                                                   | no                                | -                   | -              | -   | -    | none                                                                | yes         | no              |
| NMDARE | -        | 411123    | f   | 23  | insomnia, cognitive impairment, psychomotor<br>retardation                                                                                        | no                                | -                   | -              | -   | -    | none                                                                | yes         | no              |
| NMDARE | -        | 518953    | f   | 47  | disorientation, altered mental status, cognitive<br>impairment, avolition, fever, hallucinations                                                  | yes                               | -                   | -              | -   | -    | s/p HSV<br>encephalitis                                             | yes         | no              |
| NMDARE | -        | 219839    | m   | 66  | acute psychosis                                                                                                                                   | yes                               | -                   | -              | -   | -    | none                                                                | yes         | no              |

Supplementary table 1: Additional clinical characteristics of F2x and NMDARE patients

Ab: antibody; ADHD: attention deficit hyperactivity disorder; APDs: antipsychotic drugs; A.s.t.: at sample taking; Comorb: comorbidities; CSF - cerebrospinal fluid; ICU - Intensive Care Unit; f: female; Dd: differential diagnosis; Dx: diagnosis; EBV: Epstein-Barr virus; ECT - electroconvulsive therapy; F2x: patients with psychotic disorder; GAF: Global Assessment of Functioning; Hosp: hospitalizations; HSV: Herpes simplex virus; NMDARE: anti-NMDA-receptor encephalitis; m: male; OCD - obsessive-compulsive disorder; OSA - Obstructive sleep apnea; PCO - polycystic ovary syndrome; Pos: positive; Prev: previous; Pseud: pseudonym; SCC - squamous cell carcinoma; s/p: status post; sympt: symptoms

Supplementary table 2

|                                   | Outcome            | Term             | Estimate | Std.error | Statistic | P-value |
|-----------------------------------|--------------------|------------------|----------|-----------|-----------|---------|
| <b>F2x vs IIH</b>                 | Blood cMono        | dxF2x            | 2.5359   | 1.2786    | 1.9834    | 0.0489  |
|                                   | Blood iMono        | dxF2x            | -4.0791  | 0.9967    | -4.0926   | 0.0001  |
|                                   | Blood monocytes    | dxF2x            | 0.5532   | 0.4895    | 1.1301    | 0.2601  |
|                                   | Blood NK cells     | dxF2x            | 4.0075   | 1.4729    | 2.7209    | 0.0072  |
|                                   | CSF protein        | dxF2x            | 65.9218  | 29.6529   | 2.2231    | 0.0275  |
|                                   | CSF ncMono         | dxF2x            | 0.7723   | 0.3674    | 2.1019    | 0.0370  |
|                                   | CSF CD4+           | dxF2x            | -3.4326  | 1.7549    | -1.9560   | 0.0521  |
|                                   | CSF lymphocytes    | dxF2x            | -8.8637  | 3.3703    | -2.6300   | 0.0093  |
|                                   | CSF monocytes      | dxF2x            | 4.2888   | 2.0287    | 2.1140    | 0.0360  |
|                                   | CSF BBBD           | dxF2x            | 0.2181   | 0.0785    | 2.7779    | 0.0061  |
| <b>F2x vs RRMS</b>                | Blood plasma cells | dxF2x            | -0.0222  | 0.0222    | -1.0016   | 0.3180  |
|                                   | CSF cells          | dxF2x            | -6.9370  | 1.2825    | -5.4091   | 0.0000  |
|                                   | CSF BBBD           | dxF2x            | 0.1889   | 0.0768    | 2.4611    | 0.0149  |
|                                   | CSF Ig synthesis   | dxF2x            | -0.5720  | 0.0617    | -9.2698   | 0.0000  |
|                                   | CSF ocbs           | dxF2x            | -0.8528  | 0.0493    | -17.2878  | 0.0000  |
|                                   | CSF B cells        | dxF2x            | -2.9297  | 0.5290    | -5.5384   | 0.0000  |
|                                   | CSF cMono          | dxF2x            | -9.8327  | 3.7565    | -2.6175   | 0.0097  |
|                                   | CSF iMono          | dxF2x            | 9.6811   | 3.7150    | 2.6060    | 0.0100  |
|                                   | CSF HLA-DR+CD4+    | dxF2x            | -2.7357  | 1.1469    | -2.3853   | 0.0182  |
|                                   | CSF granulocytes   | dxF2x            | 4.3651   | 2.1996    | 1.9845    | 0.0488  |
|                                   | CSF lymphocytes    | dxF2x            | -20.5043 | 3.2945    | -6.2237   | 0.0000  |
|                                   | CSF monocytes      | dxF2x            | 13.8677  | 1.9831    | 6.9928    | 0.0000  |
|                                   | CSF NK cells       | dxF2x            | 0.8192   | 0.3009    | 2.7221    | 0.0072  |
|                                   | CSF plasma cells   | dxF2x            | -0.6575  | 0.1128    | -5.8275   | 0.0000  |
|                                   | CSF T cells        | dxF2x            | 2.4631   | 0.9007    | 2.7346    | 0.0069  |
| CSF HLA-DR+T cells                | dxF2x              | -3.8443          | 1.4685   | -2.6179   | 0.0097    |         |
| <b>F2x vs NMDARE</b>              | Blood cMono        | dxF2x            | 4.4450   | 1.8010    | 2.4680    | 0.0146  |
|                                   | Blood iMono        | dxF2x            | -3.0283  | 1.4040    | -2.1570   | 0.0324  |
|                                   | Blood granulocytes | dxF2x            | -7.1205  | 2.4714    | -2.8811   | 0.0045  |
|                                   | Blood lymphocytes  | dxF2x            | 6.5321   | 2.1188    | 3.0829    | 0.0024  |
|                                   | Blood plasma cells | dxF2x            | -0.1633  | 0.0320    | -5.1086   | 0.0000  |
|                                   | Blood NK dim       | dxF2x            | 10.3580  | 2.7551    | 3.7595    | 0.0002  |
|                                   | CSF cells          | dxF2x            | -7.9329  | 1.8481    | -4.2926   | 0.0000  |
|                                   | CSF protein        | dxF2x            | 37.4051  | 41.7697   | 0.8955    | 0.3718  |
|                                   | CSF BBBD           | dxF2x            | 0.2170   | 0.1106    | 1.9618    | 0.0514  |
|                                   | CSF Ig synthesis   | dxF2x            | -0.3368  | 0.0889    | -3.7875   | 0.0002  |
|                                   | CSF ocbs           | dxF2x            | -0.4756  | 0.0711    | -6.6906   | 0.0000  |
|                                   | CSF B cells        | dxF2x            | -4.8341  | 0.7623    | -6.3418   | 0.0000  |
|                                   | CSF cMono          | dxF2x            | -16.0706 | 5.4131    | -2.9688   | 0.0034  |
|                                   | CSF iMono          | dxF2x            | 17.7624  | 5.3533    | 3.3180    | 0.0011  |
|                                   | CSF granulocytes   | dxF2x            | 9.0018   | 3.1697    | 2.8400    | 0.0051  |
|                                   | CSF lymphocytes    | dxF2x            | -23.1083 | 4.7474    | -4.8675   | 0.0000  |
|                                   | CSF monocytes      | dxF2x            | 12.6982  | 2.8577    | 4.4435    | 0.0000  |
|                                   | CSF plasma cells   | dxF2x            | -0.1463  | 0.1626    | -0.8999   | 0.3694  |
|                                   | CSF T cells        | dxF2x            | 3.3017   | 1.2980    | 2.5438    | 0.0119  |
|                                   | CSF NK bright      | dxF2x            | 17.6142  | 5.7973    | 3.0384    | 0.0028  |
| <b>F2x corr. GAF</b>              | CSF ncMono         | GAF              | -0.0451  | 0.0201    | -2.2456   | 0.0290  |
|                                   | Blood CD 8+        | GAF              | -0.1793  | 0.0844    | -2.1227   | 0.0386  |
|                                   | Blood NK cells     | GAF              | 0.2052   | 0.0990    | 2.0725    | 0.0432  |
|                                   | Blood T cells      | GAF              | -0.2249  | 0.1018    | -2.2091   | 0.0316  |
| <b>F2x corr. hospitalizations</b> | CSF protein        | prev. hosp.      | 13.1021  | 8.5662    | 1.5295    | 0.1320  |
|                                   | CSF NK T cells     | prev. hosp.      | 0.1958   | 0.0996    | 1.9667    | 0.0544  |
|                                   | Blood NK cells     | prev. hosp.      | -0.9537  | 0.4441    | -2.1473   | 0.0363  |
|                                   | Blood T cells      | prev. hosp.      | 1.3856   | 0.4705    | 2.9453    | 0.0048  |
|                                   | Blood NK bright    | prev. hosp.      | 0.5113   | 0.2518    | 2.0303    | 0.0473  |
| <b>F2x corr. duration</b>         | CSF protein        | disease duration | 3.8572   | 2.3948    | 1.6107    | 0.1132  |
|                                   | Blood iMono        | disease duration | 0.1035   | 0.0525    | 1.9703    | 0.0540  |

Supplementary table 2: Multiple regression analysis adjusting for age and sex

BBBD: blood-brain-barrier dysfunction; cMono: classical monocytes; corr: correlation; CSF: cerebrospinal fluid; dx: diagnosis; F2x: patients with psychotic disorder; hosp: hospitalizations; Ig: immunoglobulin; IIH: intracranial hypertension; iMono: intermediate monocytes; ncMono: non-classical monocytes; NK: natural killer cells; NMDARE: anti-NMDA-receptor encephalitis; ocb: oligoclonal band; p: previous; RRMS: Relapsing-Remitting Multiple Sclerosis; Std: standard; vs: versus

**Supplementary table 3**

| <b>F2x vs IIH (blood)</b>    |                  |            | <b>F2x vs IIH (CSF)</b>    |                  |            |
|------------------------------|------------------|------------|----------------------------|------------------|------------|
|                              | <u>Parameter</u> | <u>AUC</u> |                            | <u>Parameter</u> | <u>AUC</u> |
|                              | iMono            | 0.7807     |                            | Protein          | 0.7362     |
|                              | NK cells         | 0.6741     |                            | ncMono           | 0.7172     |
|                              | Monocytes        | 0.6636     |                            | Lymphocytes      | 0.6752     |
|                              | cMono            | 0.6620     |                            | Monocytes        | 0.6403     |
|                              | B cells          | 0.6456     |                            | CD4+             | 0.6346     |
|                              | ncMono           | 0.6154     |                            | CD4+CD8+ ratio   | 0.6170     |
|                              | T cells          | 0.5957     |                            | CD8+             | 0.6139     |
|                              | NK dim           | 0.5792     |                            | B cells          | 0.5860     |
|                              | HLA-DR+CD4+      | 0.5764     |                            | T cells          | 0.5597     |
|                              | Granulocytes     | 0.5736     |                            | Nk T cells       | 0.5549     |
|                              | CD4+             | 0.5713     |                            | Granulocytes     | 0.5499     |
|                              | NK bright        | 0.5660     |                            | iMono            | 0.5441     |
|                              | CD4+CD8+ ratio   | 0.5656     |                            | CD4+CD8+         | 0.5345     |
|                              | HLA-DR+ T cells  | 0.5642     |                            | NK bright        | 0.5335     |
|                              | CD 8+            | 0.5597     |                            | cMono            | 0.5308     |
|                              | NK T cells       | 0.5371     |                            | HLA-DR+ T cells  | 0.5167     |
|                              | Lymphocytes      | 0.5252     |                            | HLA-DR+CD4+      | 0.5096     |
|                              | HLA-DR+CD8+      | 0.5184     |                            | cells            | 0.5010     |
|                              | CD4+CD8+         | 0.5078     |                            | NK dim           | 0.4995     |
|                              | Plasma cells     | 0.4654     |                            | HLA-DR+CD8+      | 0.4949     |
|                              |                  |            |                            | Ig synthesis     | 0.4914     |
|                              |                  |            |                            | Ocbs             | 0.4914     |
|                              |                  |            |                            | Plasma cells     | 0.4819     |
|                              |                  |            |                            | NK cells         | 0.4753     |
|                              |                  |            |                            | BBBD             | 0.3326     |
| <b>F2x vs RRMS (blood)</b>   |                  |            | <b>F2x vs RRMS (CSF)</b>   |                  |            |
|                              | <u>Parameter</u> | <u>AUC</u> |                            | <u>Parameter</u> | <u>AUC</u> |
|                              | B cells          | 0.6195     |                            | Ocbs             | 0.9302     |
|                              | Monocytes        | 0.6191     |                            | Plasma cells     | 0.8967     |
|                              | Plasma cells     | 0.6191     |                            | Monocytes        | 0.8804     |
|                              | NK cells         | 0.6087     |                            | Lymphocytes      | 0.8293     |
|                              | Granulocytes     | 0.6034     |                            | Cells            | 0.8024     |
|                              | iMono            | 0.6017     |                            | Ig synthesis     | 0.7975     |
|                              | Lymphocytes      | 0.5911     |                            | B cells          | 0.7964     |
|                              | CD4 +            | 0.5822     |                            | NK T cells       | 0.7634     |
|                              | CD4+CD8+ ratio   | 0.5767     |                            | iMono            | 0.6828     |
|                              | cMono            | 0.5695     |                            | cMono            | 0.6793     |
|                              | CD8+             | 0.5672     |                            | Granulocytes     | 0.6740     |
|                              | T cells          | 0.5626     |                            | HLA-DR+ T cells  | 0.6564     |
|                              | NK T cells       | 0.5447     |                            | HLA-DR+CD4+      | 0.6473     |
|                              | HLA-DR+CD4+      | 0.5232     |                            | T cells          | 0.6429     |
|                              | HLA-DR+ T cells  | 0.5048     |                            | HLA-DR+CD8+      | 0.6047     |
|                              | ncMono           | 0.5023     |                            | Protein          | 0.5901     |
|                              | CD4 + CD8 +      | 0.5023     |                            | CD4+CD8+         | 0.5827     |
|                              | NK dim           | 0.4937     |                            | NK cells         | 0.5760     |
|                              | NK bright        | 0.4898     |                            | NK dim           | 0.5574     |
|                              | HLA-DR+CD8+      | 0.4761     |                            | ncMono           | 0.5533     |
|                              |                  |            |                            | NK bright        | 0.5470     |
|                              |                  |            |                            | CD4+             | 0.5271     |
|                              |                  |            |                            | CD8+             | 0.5264     |
|                              |                  |            |                            | CD4+CD8+ ratio   | 0.5260     |
|                              |                  |            |                            | BBBD             | 0.3661     |
| <b>F2x vs NMDARE (blood)</b> |                  |            | <b>F2x vs NMDARE (CSF)</b> |                  |            |
|                              | <u>Parameter</u> | <u>AUC</u> |                            | <u>Parameter</u> | <u>AUC</u> |
|                              | Plasma cells     | 0.7834     |                            | Lymphocytes      | 0.8707     |
|                              | Lymphocytes      | 0.7505     |                            | Monocytes        | 0.8438     |
|                              | NK dim           | 0.7462     |                            | B Cells          | 0.8206     |
|                              | iMono            | 0.7414     |                            | Cells            | 0.8023     |
|                              | Granulocytes     | 0.7360     |                            | Granulocytes     | 0.8006     |
|                              | cMono            | 0.7107     |                            | iMono            | 0.7656     |
|                              | NK cells         | 0.6347     |                            | cMono            | 0.7441     |
|                              | HLA-DR+ T cells  | 0.6078     |                            | Ocbs             | 0.7414     |
|                              | B cells          | 0.5981     |                            | Plasma cells     | 0.7101     |
|                              | NK bright        | 0.5927     |                            | Protein          | 0.7047     |
|                              | HLA-DR+CD8+      | 0.5916     |                            | NK bright        | 0.7037     |
|                              | Monocytes        | 0.5787     |                            | T cells          | 0.6832     |
|                              | CD4+CD8+ ratio   | 0.5787     |                            | Ig synthesis     | 0.6789     |
|                              | CD8+             | 0.5776     |                            | NK T cells       | 0.6730     |
|                              | ncMono           | 0.5749     |                            | HLA-DR+CD8+      | 0.5894     |
|                              | CD4+             | 0.5636     |                            | ncMono           | 0.5695     |
|                              | CD4+CD8+         | 0.5593     |                            | CD4+CD8+         | 0.5668     |
|                              | HLA-DR+CD4+      | 0.5593     |                            | CD4+             | 0.5587     |
|                              | T cells          | 0.5506     |                            | CD8+             | 0.5560     |
|                              | NK T cells       | 0.5242     |                            | HLA-DR+ T cells  | 0.5560     |
|                              |                  |            |                            | NK dim           | 0.5550     |
|                              |                  |            |                            | CD4+CD8+ ratio   | 0.5528     |
|                              |                  |            |                            | NK cells         | 0.5436     |
|                              |                  |            |                            | HLA-DR+CD4+      | 0.5323     |
|                              |                  |            |                            | BBBD             | 0.3470     |

**Supplementary table 3: ROC AUC values of F2x vs IIH, RRMS, and NMDARE patients**

AUC: area under the curve; BBBD: blood-brain-barrier dysfunction; cMono: classical monocytes; CSF: cerebrospinal fluid; F2x: patients with psychotic disorder; Ig: immunoglobulin; IIH: intracranial hypertension; iMono: intermediate monocytes; ncMono: non-classical monocytes; NK: natural killer cells; NMDARE: anti-NMDA-receptor encephalitis; ocbs: oligoclonal band; RRMS: Relapsing-Remitting Multiple Sclerosis.

## Supplementary table 4

| <b>F2x vs IIH (combined)</b> | <b>Model</b>        | <b>ROC</b> | <b>ROC SD</b> | <b>Sens</b> | <b>Sens SD</b> | <b>Spec</b> | <b>Spec SD</b> |
|------------------------------|---------------------|------------|---------------|-------------|----------------|-------------|----------------|
|                              | <b>Elastic net</b>  | 0.87902    | 0.07939       | 0.83800     | 0.13653        | 0.74133     | 0.15887        |
|                              | <b>FDA</b>          | 0.76098    | 0.12374       | 0.71600     | 0.17317        | 0.66400     | 0.17455        |
|                              | <b>Lasso</b>        | 0.87351    | 0.08755       | 0.80733     | 0.12765        | 0.74067     | 0.17331        |
|                              | <b>LDA RFE</b>      | 0.86782    | 0.08644       | 0.79200     | 0.14778        | 0.77467     | 0.16254        |
|                              | <b>LR RFE</b>       | 0.76309    | 0.11626       | 0.71000     | 0.17000        | 0.73000     | 0.15002        |
|                              | <b>N. Bayes RFE</b> | 0.82456    | 0.10707       | 0.74733     | 0.15343        | 0.76667     | 0.16454        |
|                              | <b>Ridge</b>        | 0.87442    | 0.08055       | 0.81400     | 0.12437        | 0.72067     | 0.17035        |
|                              | <b>SVM RFE</b>      | 0.85362    | 0.09873       | 0.80133     | 0.15649        | 0.76400     | 0.14950        |

### Supplementary table 4: Performance of multiparametric models to distinguish F2x from control patients

*FDA: flexible discriminant analysis; F2x: patients with psychotic disorder; IIH: intracranial hypertension; Lasso: least absolute shrinkage and selection operator, LDA RFE: linear discriminant analysis with recursive feature elimination; LR RFE: logistic regression with recursive feature elimination; N. Bayes: naive bayes; RFE: recursive feature elimination; ROC: receiver operating characteristic; SD: standard deviation; Sens: sensitivity; Spec: specificity; SVM: support vector machines*
